1           **EEG correlates of working memory performance in females**

2

3           **Yuri G. Pavlov<sup>1,2</sup>, Boris Kotchoubey<sup>1</sup>**

4           <sup>1</sup> Institute of Medical Psychology and Behavioural Neurobiology, University of Tübingen,  
5           Tübingen, Germany

6           <sup>2</sup> Department of Psychology, Ural Federal University, Yekaterinburg, Russia

7           Yuri G. Pavlov [pavlovug@gmail.com](mailto:pavlovug@gmail.com)

8           Boris Kotchoubey [boris.kotchoubey@uni-tuebingen.de](mailto:boris.kotchoubey@uni-tuebingen.de)

9

10

11

12

13

14

15

16

17

18

19

20

21

22

23

24

25

26

27           **Abstract**

28           ***Background***

29           The study investigates oscillatory brain activity during working memory (WM) tasks. The tasks  
30 employed varied in two dimensions. First, they differed in complexity from average to highly demanding.  
31 Second, we used two types of tasks, which required either only retention of stimulus set or retention and  
32 manipulation of the content. We expected to reveal EEG correlates of temporary storage and central  
33 executive components of WM and to assess their contribution to individual differences.

34           ***Results***

35           Generally, as compared with the retention condition, manipulation of stimuli in WM was associated  
36 with distributed suppression of alpha1 activity and with the increase of the midline theta activity. Load and  
37 task dependent decrement of beta1 power was found during task performance. Beta2 power increased with  
38 the increasing WM load and did not significantly depend on the type of the task.

39           At the level of individual differences, we found that the high performance (HP) group was  
40 characterized by higher alpha rhythm power. The HP group demonstrated task-related increment of theta  
41 power in the left anterior area and a gradual increase of theta power at midline area. In contrast, the low  
42 performance (LP) group exhibited a drop of theta power in the most challenging condition. HP group was  
43 also characterized by stronger desynchronization of beta1 rhythm over the left posterior area in the  
44 manipulation condition. In this condition, beta2 power increased in the HP group over anterior areas, but  
45 in the LP group over posterior areas.

46           ***Conclusions***

47           WM performance is accompanied by changes in EEG in a broad frequency range from theta to  
48 higher beta bands. The most pronounced differences in oscillatory activity between individuals with high  
49 and low WM performance can be observed in the most challenging WM task.

50

51

52

53           **Background**

54           The ability to retain information in memory for a short period of time is critical for numerous  
55 cognitive tasks including planning, verbal competence, spatial orientation, mental manipulations of objects  
56 and many others [12–14].

57           According to Baddeley & Hitch’s [15] model, the structure of working memory (WM) consists of  
58 several components. One of them is responsible for temporary storage of information in modality-specific  
59 buffers. Another key component, the central executive, is considered to be a set of tools designed to  
60 maintain the active representation of memory trace, to control attention and to preserve the latter from  
61 interference caused by irrelevant stimuli [16,17].

62           A number of neuroimaging studies demonstrated that maintenance of information in WM engages  
63 a broad network of neural structures mostly including prefrontal cortex, parietal and temporal areas [13,18].  
64 Whereas storage buffers represent information received from sensory inputs in posterior regions, the  
65 prefrontal cortex sustains and transforms this information and organizes executive processes of working  
66 memory [19]. Existing research highlights the importance of the fronto-parietal network activation in  
67 working memory processes, especially in high demanding tasks [20–24]. Apparently, individual differences  
68 in working memory capacity are also determined by fronto-parietal white matter connectivity [25].

69           Features of the processes presumed by Baddeley & Hitch’s model of WM cannot be characterized  
70 only by spatial distribution of brain activation. Qualitatively different information about these processes  
71 can be obtained from studies of neuronal oscillatory activity as an energy-efficient mechanism for temporal  
72 coordination of cognitive processes [26].

73           An increase of frontal midline *theta* rhythm (FMT) frequently accompanies such processes as  
74 nonspecific attention and WM [3,27–29]. The results of earlier studies often define FMT as the most  
75 plausible phenomenon reflecting an activation of central executive components of WM [30]. Several  
76 attempts to isolate central executive components from temporary storage components by including tasks  
77 requiring mental manipulations support hypothesis of the link between FMT and the executive control [31–  
78 33]. Several studies demonstrated the activation of fronto-parietal executive control system during retention

79 in WM [34–36]. Moreover, some authors report increasing fronto-parietal synchronization with stronger  
80 engagement of central executive components [29]. Induced coupling of theta rhythm between frontal and  
81 parietal cortical regions by transcranial alternating current stimulation (tACS) resulted in improved visual  
82 WM performance, while the induced decoupling lead to WM deterioration [37].

83 Changes in *alpha* activity also show parametrical increase related to working memory load [38–40].  
84 Increasing power of alpha rhythm is frequently interpreted as a mechanism for filtration and for suppression  
85 of the cortical areas irrelevant to the current task [40–42].

86 The role of *beta* activity in working memory processes is still not sufficiently investigated. Thus the  
87 activity particularly in the low beta band (~13-20 Hz) was found to increase during retention in WM [3,43–  
88 45]. A parametrical increase of low beta with the increasing of memory set size was also observed [3,43].  
89 A comparison of retention condition with the conditions where participants were instructed to manipulate  
90 objects in WM showed that gradually increasing task complexity was related with a decrease of low beta  
91 activity [32].

92 Data of several studies suggest that the main contribution to individual differences in WM is made  
93 by the ability to control attention or executive control [46–48]. However, despite extensive research of WM  
94 in the recent 20 years, there is no clarity as regards the electrophysiological correlates mechanisms of  
95 individual differences in WM performance. The existing research (both general and differential  
96 psychological) have some limitations that restrict the possibility to explain the actual relationship between  
97 brain activity and WM performance.

98 First of all, most WM studies have used the n-back paradigm [1,2,49]. This kind of task engages  
99 multiple WM processes including retention of the stimuli set presented at the previous step, comparison  
100 between the first item of the memorized set and the new one, making decision about correctness of the  
101 comparison, and updating the content of WM. In this paradigm, it is difficult to clearly separate retention  
102 from the central executive components of WM.

103 Second, the level of difficulty of the task is usually moderate and thus does not present a big  
104 challenge for people with average WM abilities. There are studies dedicated to the investigation of EEG in



105 WM tasks with several levels of difficulty [1,3,4,9]. In the studies mentioned above the number of steps  
106 did not exceed three (3-back) [1,2]. Some researchers applied other paradigms with gradually increasing  
107 difficulty of tasks for assessing WM performance [3,28,33]. But these paradigms either did not include any  
108 manipulation task [3,28], or their difficulty level was rather low [33].

109 Finally, the existing studies aimed to discover electrophysiological correlates of individual  
110 differences in WM were based on a sample size not exceeding 14 participants in each group [1,3,50]. An  
111 analysis of typical effect sizes indicates that at least twice larger groups would be necessary to reliably  
112 evaluate the differences between high- and low-performers.

113 In this paper we used highly demanding tasks which should give us the opportunity to distinguish  
114 EEG activity of individuals with different levels of WM performance. Additionally, using two types of  
115 tasks, which required either only retention of stimulus set or manipulation of content, we expected to reveal  
116 EEG correlates of temporary storage and central executive components of WM and to assess their  
117 contribution to individual differences.

118 The hypotheses of the study were as follows:

119 1. Motivated by the previous studies we expected significant relationships between WM  
120 performance and oscillatory activity in theta and alpha frequency bands;

121 2. Particularly, we supposed that frontal theta rhythm power is strongly related to the WM load;

122 3. We expected that storage components of working memory play less important role in individual  
123 differences than executive components. Specifically, we assumed that no individual differences would be  
124 found in the simple retention conditions;

125 4. Additionally, we hypothesized that the most challenging condition would best separate between  
126 low and high performers;

127

## 128 **Methods**

129

130 *Participants*

131

132 Due to a strong gender disproportion in the initial sample, only data of female participants were  
133 included into the present study. All participants were Russian native speakers. Furthermore, a subsequent  
134 analysis revealed five EEG records with an excessive amount of artefacts (i.e., less than 20 artifact-free  
135 epochs in at least one condition). Thus, 65 female participants (mean age = 20.92, SD=2.96) were included  
136 to the final sample. The participants had normal or corrected-to-normal vision and no history of  
137 neurological or mental diseases.

138

### 139 *Stimuli*

140

141 Sets of Russian alphabet letters written in capital were used as stimuli. The letters had been selected  
142 randomly and had random order and no repetitions in the sets. Each trial consisted of 7 consecutive events.  
143 An analogue using Latin letters and English words is shown in Fig. 1.

144

145 Insert Figure 1 about here

146

147 A trial always began with an exclamation mark presented for 200 ms, which was followed by a  
148 fixation cross for 3000 ms. Participants were instructed to fixate the cross when it appeared in the center of  
149 the screen. At the next step the word “forward” or “alphabetical”, presented for 500 ms, instructed  
150 participants whether they would have to memorize the original set as it was presented (retention task) or to  
151 memorize it after mental recombination of the letters in the alphabetical order (manipulation task). After  
152 that, sets of 5, 6 or 7 letters were demonstrated for 3000 ms followed by a delay period where a fixation  
153 cross was demonstrated for 6500 ms. At the end of this delay period, a randomly chosen letter from the  
154 previously presented set appeared on the screen together with a digit that represented the serial number of  
155 this letter. The letter-digit combination was presented for 1000 ms. Participants were asked to press a  
156 specified button of a computer mouse if the presented letter had the corresponding serial number either in

157 the original set (in the retention task), or in the set merging as a result of alphabetic recombination (in the  
158 manipulation task). The other mouse button had to be pressed if the serial number of the presented letter  
159 was incorrect. The two buttons were attributed to correct and wrong probes in a counterbalanced order. The  
160 probe was correct in 50 % of the trials, and the order of correct and incorrect probes was random. The next  
161 trial started after an interval that varied between 5000 and 5500 ms.

162 Thus, the experiment entailed six different conditions: memorizing 5, 6 or 7 letters in the  
163 alphabetical or forward order. Each condition had 20 consecutive trials. These six blocks with 20 trials were  
164 presented in a random order. A short practice block of 6 trials was given immediately before the main  
165 experiment.

166 During the experiment, the participants were seated in a comfortable armchair in front of a com  
167 puter screen in a dark room. Stimuli were presented in white color on a black background in the center of  
168 the screen by using PsyTask software (Mitsar Ltd.). The distance to the screen was 1 m and the size of the  
169 letters was  $1.2 \times 1.2^\circ$ .

170 All participants were subdivided into two groups separated by the median of their mean performance  
171 across all tasks. The groups are referred to as high performance (HP; N = 32) and low performance (LP; N  
172 = 33) groups. The percentage of correct answers was used for behavioral data analysis. A repeated measures  
173 ANOVA with the between-subject factor Group (HP, LP) and the within-subject factors Task (retention,  
174 manipulation) and Load (5, 6, or 7 letters) was applied.

175

### 176 *EEG recording and analysis*

177

178 The EEG was recorded from 19 electrodes arranged according to the 10-20 system using Mitsar-  
179 EEG-201 amplifier and referred to the average earlobe. Two additional electrodes were used for horizontal  
180 and vertical EOG. EEG data were acquired with 500 Hz sampling frequency, 0.16 Hz high pass filter and  
181 70 Hz low pass filter.

182 Frequency bands for EEG analysis were defined using individual alpha frequency (IAF) as follows:  
183  $\theta = [\text{IAF}-6 \text{ Hz to IAF}-2.5 \text{ Hz}]$ ,  $\alpha_1 = [\text{IAF}-2.5 \text{ Hz to IAF}]$ ,  $\alpha_2 = [\text{IAF to IAF}+2.5 \text{ Hz}]$ ,  $\beta_1 =$   
184  $[\text{IAF}+2.5 \text{ Hz to } 20 \text{ Hz}]$ ,  $\beta_2 = [20 \text{ Hz to } 30 \text{ Hz}]$ . The IAF was determined on a 3 min EEG recorded at  
185 rest with eyes closed.

186 Segments of raw EEG recorded during the interval from 500 ms to 6500 ms of the delay period were  
187 analyzed. These segments were filtered between 0.5 and 30 Hz, and a 50-Hz notch filter was applied. The  
188 segments were subdivided into 2-second epochs. A fast Fourier transformation (FFT) was performed in  
189 each epoch. Ocular artefacts were corrected by using independent component analysis (ICA) followed by  
190 visual EEG inspection for remaining artefacts. These operations were performed in EEGLab toolbox.  
191 Spectral power densities for each frequency bands were calculated using Fieldtrip toolbox.

192 Spectral power data were statistically analyzed by using two independent mixed-design ANOVAs.  
193 The first analysis involved mean power values in four regions of interest (ROI): left (Fp1, F7, F3) and right  
194 (Fp2, F8, F4) anterior areas, left (T5, P3, O1) and right (T6, P4, O2) posterior areas. This analysis included  
195 a between-subject factor Group (HP, LP) and the within-subject factors Task (retention, manipulation),  
196 Load (5 versus 7 letters), Hemisphere (left, right) and Site (anterior, posterior). The second ANOVA of  
197 mean power values at the midline (Fz, Cz, Pz) analogous to the previous with factors Group, Task and Load  
198 was performed. All statistical calculations were performed by using SPSS package.

199

## 200 **Results**

201

### 202 *Behavioral results*

203

204 Participants performed with a general mean accuracy of  $78.5 \pm 0.9\%$ . Mean accuracies for each  
205 condition are shown in Fig. 2.

206 The main effects of Task ( $F(1, 63) = 108.1$ ,  $p < 0.0001$ ,  $\eta^2 = .632$ ) and Load ( $F(2, 126) = 49.69$ ,  $p$   
207  $< 0.0001$ ,  $\eta^2 = .441$ ) as well as their interaction of the factors ( $F(2, 126) = 5.606$ ,  $p = 0.005$ ,  $\eta^2 = .082$ ) were

208 obtained. A pairwise comparison between load levels separately for alphabetical and forward conditions  
209 showed highly significant differences ( $p < 0.0001$ ) for all pairs but two. First, there was no difference  
210 between the performance in 5- and 6-letter conditions in the forward order ( $p = 0.191$ ). Second, the  
211 differences were less pronounced in the comparison between 6 and 7 letters in the alphabetical order  
212 ( $p = 0.011$ ; not significant after Bonferroni correction). For this reason, and in order to avoid potential  
213 problem with sphericity in statistical measures, the 6-letters condition was excluded from the EEG analysis.

214 The mean performance accuracy in the high and low performance groups was  $84.9 \pm 0.5\%$  and  
215  $71.9 \pm 1.1\%$ , respectively ( $F(1, 63) = 87.26$ ,  $p < 0.0001$ ,  $\eta^2 = .581$ ).

216

217 Insert Figure 2 about here

218

219 *Electrophysiological results*

220

221

222 Table 1

223 Results of the ANOVA with the factors Task x Load x Hemisphere x Site x Group.

|                                         | <i>Theta</i> |                 |          | <i>Alpha1</i> |                 |          | <i>Alpha2</i> |                 |          | <i>Beta1</i> |                 |          | <i>Beta2</i> |                 |          |
|-----------------------------------------|--------------|-----------------|----------|---------------|-----------------|----------|---------------|-----------------|----------|--------------|-----------------|----------|--------------|-----------------|----------|
|                                         | F            | p               | $\eta^2$ | F             | p               | $\eta^2$ | F             | p               | $\eta^2$ | F            | p               | $\eta^2$ | F            | p               | $\eta^2$ |
| <i>Task</i>                             | 3.631        | .061            | .054     | 9.694         | <b>.003</b>     | .133     |               |                 |          | 10.680       | <b>.002</b>     | .145     |              |                 |          |
| <i>Load</i>                             |              |                 |          |               |                 |          |               |                 |          |              |                 |          | 4.781        | <b>.033</b>     | .071     |
| <i>Site</i>                             | 14.24        | <b>&lt;.001</b> | .184     | 29.38         | <b>&lt;.001</b> | .318     | 25.39         | <b>&lt;.001</b> | .287     | 16.747       | <b>&lt;.001</b> | .210     | 22.75        | <b>&lt;.001</b> | .265     |
| <i>Hemisphere</i>                       | 7.712        | <b>.007</b>     | .109     |               |                 |          |               |                 |          |              |                 |          |              |                 |          |
| <i>Group</i>                            |              |                 |          |               |                 |          | 6.143         | <b>.016</b>     | .089     |              |                 |          |              |                 |          |
| <i>Site x Hemisphere</i>                |              |                 |          |               |                 |          |               |                 |          | 5.159        | <b>.027</b>     | .076     |              |                 |          |
| <i>Task x Group</i>                     |              |                 |          | 4.763         | <b>.033</b>     | .070     |               |                 |          |              |                 |          |              |                 |          |
| <i>Task x Load</i>                      | 4.415        | <b>.040</b>     | .065     |               |                 |          |               |                 |          | 6.376        | <b>.014</b>     | .092     |              |                 |          |
| <i>Task x Site</i>                      | 8.285        | <b>.005</b>     | .116     | 5.620         | <b>.021</b>     | .082     |               |                 |          |              |                 |          |              |                 |          |
| <i>Task x Hemisphere</i>                | 4.270        | <b>.043</b>     | .063     |               |                 |          |               |                 |          |              |                 |          |              |                 |          |
| <i>Task x Site x Group</i>              |              |                 |          |               |                 |          |               |                 |          |              |                 |          | 5.194        | <b>.026</b>     | .076     |
| <i>Load x Site x Hemisphere</i>         | 7.586        | <b>.008</b>     | .107     | 5.363         | <b>.024</b>     | .078     |               |                 |          |              |                 |          |              |                 |          |
| <i>Task x Site x Hemisphere x Group</i> | 9.042        | <b>.004</b>     | .126     |               |                 |          |               |                 |          | 5.131        | <b>.027</b>     | .075     |              |                 |          |

224

225 Table 2

226 Results of the ANOVA with the factors Task x Load x Group for midline sites.

|                     |               | F      | p               | $\eta^2$ |
|---------------------|---------------|--------|-----------------|----------|
| <i>Task</i>         | <i>Theta</i>  | 7.685  | <b>.007</b>     | .109     |
|                     | <i>Alpha1</i> | 6.526  | <b>.013</b>     | .094     |
|                     | <i>Beta1</i>  | 20.427 | <b>&lt;.001</b> | .245     |
|                     | <i>Alpha1</i> | 4.715  | <b>.034</b>     | .070     |
| <i>Load x Group</i> | <i>Theta</i>  | 4.465  | <b>.039</b>     | .066     |
| <i>Task x Group</i> | <i>Beta1</i>  | 6.281  | <b>.015</b>     | .091     |
| <i>Task x Load</i>  | <i>Theta</i>  | 5.462  | <b>.023</b>     | .080     |
|                     | <i>Beta1</i>  | 5.895  | <b>.018</b>     | .086     |

227

228 *General tendencies*

229

230 *Theta*

231

232 The theta rhythm had lower power in anterior areas in comparison with posterior areas (main effect  
233 of Site, see Table 1 for this section). Also, the power was higher over the left than the right hemisphere  
234 (main effect of Hemisphere). Furthermore, the theta power decreased with the increasing WM load at all  
235 ROIs except the right anterior one (Load x Site x Hemisphere interaction).

236 Across the whole sample, the theta power tended to be higher in the manipulation task than in the  
237 retention task. As depicted in Fig. 3. this effect was more pronounced at anterior than posterior areas (Task  
238 x Site interaction) and also more pronounced over the left than the right hemisphere (Task x Hemisphere  
239 interaction).

240 The analysis of midline theta showed higher power in the manipulation task than in the retention  
241 task (main effect of Task, see Table 2). Increasing number of the presented letters from 5 to 7 yielded a  
242 decrease of theta power in the manipulation task but its increase in the retention task (Task x Load  
243 interaction). This interaction was, however, strongly modified by the between-subject factor, as described  
244 below in the Section Individual differences-Theta.

245

246 Insert Figure 3 about here

247

248 *Alpha*

249

250 As expected, alpha1 and alpha2 activity increased in the posterior direction (main effect of Site, see  
251 Table 1).

252 Alpha1 power was lower in the manipulation task than in the retention tasks (main effect of Task).  
253 This effect was larger at the posterior than anterior sites (Task x Site interaction).



254 Alpha1 activity was suppressed with increasing WM load in each ROI except the right posterior  
255 area where alpha1 power increased (Load x Site x Hemisphere interaction).

256

257 *Beta1*

258

259 Beta1 power was significantly lower in the anterior than posterior areas (main effect of Site), and  
260 lower on the left than right side (main effect of Hemisphere).

261 As can be seen in Fig. 4, beta1 power increased with the increasing WM load in the manipulation  
262 conditions but decreased in the retention conditions (Task x Load interaction). In general, the power was  
263 higher in the retention condition than in the manipulation condition (main effect of Task).

264

265 Insert Figure 4 about here

266

267 *Beta2*

268

269 In contrast to beta1, beta2 power was significantly larger in the anterior than posterior areas (main  
270 effect of Site). Increasing WM load led to an increase in beta2 activity (main effect of Load).

271

272 *Individual differences*

273

274 *Theta*

275

276 The analysis revealed a four-way interaction between Task, Site, Hemisphere and Group. Additional  
277 separate analyses in groups were performed. In the HP group we observed a larger theta power in the  
278 manipulation condition than in the retention condition, and the magnitude of this effect was the highest in

279 the left anterior area (Task x Site x Hemisphere interaction ( $F(1, 31) = 7.605$ ,  $p = 0.01$ ,  $\eta^2 = .197$ ). No  
280 significant effects were found in the LP group.

281 An ANOVA performed on midline electrodes revealed opposite load dependent changes of the  
282 midline theta power in the HP and LP groups. As depicted in Fig. 5, an increase of the number of letters  
283 from 5 to 7 was associated with an increase of theta activity in the former group but its decrease in the latter  
284 (Load x Group interaction, see Table 1). Fig. 5 shows that the significant Load x Task interaction for the  
285 entire sample, described above in Section General tendencies-Theta, is actually produced by the dramatic  
286 decrement of the theta power in the most demanding condition (manipulation task, high WM load) in the  
287 LP group. Similarly, the triple interaction Load x Site x Hemisphere for the entire sample does not really  
288 characterize the entire sample but, like the Load x Task interaction, can be attributed to a disproportionately  
289 strong influence of the LP group.

290

291 Insert Figure 5 about here

292

293 *Alpha*

294

295 As can be seen in Fig. 6, the suppression of the alpha1 power in the manipulation task relative to  
296 the retention task was stronger in the HP than the LP group (Task x Group interaction). Alpha2 was  
297 generally stronger in the HP than the LP group (main effect of Group).

298

299 Insert Figure 6 about here

300

301 *Beta1*

302

303 A significant four-way interaction Task x Site x Hemisphere x Group was obtained and further  
304 analyzed for groups and for electrode sites. The first ANOVA yielded a significant Task x Site x  
305 Hemisphere interaction ( $F(1, 31) = 6.471, p < 0.05, \eta^2 = .131$ ) only in the HP group, indicating that the  
306 decrease of the beta1 power from the retention task to the manipulation task was more pronounced in the  
307 left posterior and the right anterior ROIs. No such effects were observed in the LP group.

308 The second ANOVA revealed a significant Task x Group interaction in the left posterior ROI ( $F(1,$   
309  $31) = 5.953, p < 0.05, \eta^2 = .086$ ), indicating task dependent changes of beta1 power at the left posterior area  
310 in the HP group (see Fig. 7).

311

312 Insert Figure 7 about here

313

314 *Beta2*

315

316 The significant Task x Site x Group interaction (see Table 1) indicates opposite task- and location-  
317 related changes in the two groups. The LP group showed higher beta2 activity in the manipulation task at  
318 anterior areas but in the retention task at posterior areas, while the opposite held true for the HP group (Fig.  
319 8).

320

321 Insert Figure 8 about here

322

323 **Discussion**

324

325 *General tendencies*

326

327 *Theta and central executive components of WM*

328

329           The current study found that increasing WM task complexity and executive control demand were  
330 associated with the increase of the frontal theta activity. Increasing theta power in midline and frontal areas  
331 during mental manipulations in contrast to the mere retention of memory content is in line with numerous  
332 data indicating positive relationships between FMT and cognitive load [3,9–11,28]. Moreover, an increase  
333 of FMT in manipulation tasks as compared with retention tasks was also found in studies whose design was  
334 similar to the present one [31–33,52].

335           In addition, the link between FMT and the activation of the anterior cingulate cortex (ACC) and the  
336 medial prefrontal cortex (mPFC) was repeatedly proven by simultaneous EEG-fMRI recordings as well as  
337 by direct electrophysiological recordings in monkeys [53–56]. The ACC and the mPFC are active during  
338 memory processes, WM performance, and executive control [57–59].

339           We assume that the increment of FMT (supposedly indicating the activation of the ACC) with  
340 increasing WM demands is related to increasing involvement of executive processes. However, it should  
341 be noted that FMT reflects not pure memory processes per se but more likely the allocation of cortical  
342 resources depending on features of the task [3,59,60]. One may speculate that increasing demands for  
343 executive control during manipulation of information in WM engage a widely distributed network whose  
344 main components are the prefrontal cortex and the ACC.

345

#### 346           *Alpha1 and the storage components of WM*

347

348           As compared with the retention condition, manipulation of stimuli in WM was associated with  
349 distributed suppression of alpha1 activity. There is an empirically well supported hypothesis that  
350 desynchronization of low alpha is a nonspecific cortical response that can be observed during various  
351 cognitive operations [9,38,61] including maintaining information in WM [53,62,63]. In addition to this  
352 non-specificity model, however, more specific hypotheses about the dynamics of alpha exist. Thus, the

353 alpha synchronization in posterior areas during the maintenance of actual information may reflect active  
354 inhibition to protect these areas from reorienting to new irrelevant information processing [28,42]. It is  
355 plausible that the temporary storage components of WM play the key role in a successful maintenance of 7  
356 letters relative to 5 letters. It might be suggested that when the volume of information maintained in the  
357 temporary storage approaches the putative capacity limit ( $7 \pm 2$ ) the central executive should actively inhibit  
358 irrelevant information. The observed asymmetry of alpha1 power at the posterior area agrees with the  
359 previous studies of WM and short-term memory [9,28,54,64,65].

360

361 *Beta1 and manipulation of information in WM*

362

363 Task-related decrement of beta1 power found in this study was quite similar to the effect reported  
364 by Berger et al. [32] who also compared manipulation versus retention conditions. This effect may be  
365 explained by the conception of Engel & Fries [66] that, applied to the present experiment, suggests that  
366 the decrease of beta1 power takes place during updating or manipulating information in WM as well as  
367 during retrieval of information from long term memory and encoding it in WM. The desynchronization of  
368 the beta1 rhythm can be attributed to the sequential updating of the WM content during mental  
369 alphabetizing of the letters. This process also involves addressing the long term memory where the alphabet  
370 is stored.

371 Load-dependent changes in beta1 power were observed only in the manipulation condition. We  
372 hypothesize that manipulation is underpinned by two independent temporal buffers: the first one is the final  
373 storage for modified items after the manipulations, whereas the second one serves as a workspace for the  
374 remaining to-be-modified items. Perhaps, there are even two different beta1 rhythms that overlap in  
375 frequency but reflect different sub-processes in WM [67]. The first rhythm supports the activity of the first  
376 buffer (“store”), and the second rhythm, that of the second buffer (“workspace”). Synchronization of the  
377 former maintains the active state of the engram and protects it from irrelevant information. Weiss &

378 Rappelsberger [68] demonstrated a gradual increase of beta1 activity in response to sequential filling of  
379 WM by words. Research conducted by Leiberg, Lutzenberger, & Kaiser [69] also showed a load-dependent  
380 increase of beta1 activity. At the same time desynchronization of the other beta1 rhythm reflects the  
381 retrieval from long term memory and encoding to WM. In other words, desynchronization of the latter  
382 beta1 rhythm reflects manipulations of objects in “workspace” for their subsequent transfer to “store”.

383 Our hypothesis also entails that the lack of beta1 desynchronization during the encoding process  
384 indicates a disruption of memory formation. Recently, Hanslmayr, Matuschek, & Fellner [70] found a  
385 negative effect of transcranial magnetic stimulation (TMS) of the left inferior frontal gyrus at beta1  
386 frequency (18.7 Hz) on memory performance in a word-list learning task. Furthermore, a study [44]  
387 performed on monkeys demonstrated desynchronization of beta activity during updating of WM content  
388 but synchronization of beta activity during retention.

389 Probably, in the retention condition the “workspace” buffer is minimally involved. It may work at  
390 the beginning of the delay period when sequentially and quickly presented information is encoded. Thus  
391 Zanto & Gazzaley [71] found the desynchronization of beta1 rhythm during the first 1250 ms of the 4-s  
392 delay period but the synchronization from 1500 ms to the end of the delay. In the current study, the delay  
393 periods during maintaining and manipulation of 5 and 7 letters could be different due to a longer  
394 presentation time (3 seconds). Therefore, the recombination of 5 letters to the alphabetical order could  
395 already start during stimulus presentation and continue only in the “workspace” buffer without addressing  
396 the “store” buffer. When the recombination process is finished, the result is transferred to the “store” buffer  
397 and kept there until the probe is presented. The “store” buffer in this case prevents possible interference of  
398 other stimuli and maintains the actual state of the engram until the moment when its content is requested.  
399 When a longer stimulus set is memorized (i.e., 7 letters) a plausible strategy is to memorize the initial letters  
400 set and to transfer it into the “store” buffer. If this strategy is used, recombination may start after the stimuli  
401 have disappeared from the screen. During this period, both buffers are actively involved: the “store” buffer  
402 is keeping the initial set, while recombination is carried out in the “workspace” buffer. When the

403 recombination is finished the information transfers to the “store” and updates its content. This assumed  
404 information return to, and updating of, the “store” buffer would explain the increase of beta1 power from  
405 5- to 7-letter condition in the manipulation task.

406

407 *Beta2 and amount of information in WM*

408

409 Beta2 power increased with the increasing WM load and did not significantly depend on the type of  
410 the task.

411 Dissociations between the lower (13-20 Hz) and upper (25-30 Hz) beta were demonstrated earlier  
412 in a study of Shahin, Picton, & Miller [72]. The authors concluded that the increment of the upper beta may  
413 reflect maintaining verbal stimuli in auditory memory. The maintenance of stimuli in WM was also  
414 suggested to cause synchronization of beta2 (~20-30 Hz) in two different tasks [73,74]. Spitzer et al. [74]  
415 assumed that the upper beta activity is directly related to the quantity of supramodal abstract information.  
416 The significant effect of Load on beta2 power found in the present study is in line with this interpretation.

417

418 *Individual differences*

419

420 *Theta*

421

422 The task-related increment of theta power in the left anterior area was found only in the HP group.  
423 This may be related to more effective manipulations supported by the hippocampus and language cortex.  
424 Previous WM studies demonstrated a relationship between the hippocampal activity and the theta rhythm  
425 [75,76]. In animal studies, the synchronized activity of the prefrontal cortex and the hippocampus crucially  
426 determined the accuracy in WM tasks [77,78]. The prefrontal cortex is hypothesized to be supported under  
427 excessive WM load by the medial temporal lobe related to long term memory [79–81].

428           The activation of the left prefrontal cortex including the inferior frontal gyrus (IFG) and Broca's  
429 area was found in verbal tasks during executive processes functions [55,82,83]. Simultaneous EEG / fMRI  
430 recording in a modified Sternberg task revealed a load-dependent increase of left IFG activation and the  
431 theta rhythm [55]. Similar results were obtained by Chee & Choo [84] in a WM task. We suppose that the  
432 left-hemispheric accentuation of the theta rhythm represents more effective information exchange between  
433 short- and long-term memory storage in the HP group.

434           Group differences were not only task-dependent but also load-dependent. The HP group  
435 demonstrated a gradual increase of theta power at midline, reaching its peak in the most demanding  
436 condition: manipulation task with 7 letters. In contrast, the LP group exhibited a sharp drop of theta power  
437 in this condition after a maximum in the condition of moderate difficulty: manipulation with 5 letters. Since  
438 previous studies of EEG correlates of individual differences in WM were limited to moderate difficulty, we  
439 can state that our findings are fully consistent with the previous ones, where the theta activity always  
440 increased with memory load [1,3,4,9–11]. However, the most difficult task resulted in a more complex  
441 change of theta activity that has not been observed so far.

442           One may speculate that reaching the individual's WM capacity limit is accompanied by a crucial  
443 deficit of attentional resources. Post-experimental reports suggest that most participants formulated their  
444 task as "to remember all letters if possible", but possibly, some LP participants in the most difficult  
445 condition changed the task to "to remember at least some letters". Alternatively, some subjects may have  
446 switched strategy to "remember the first few letters with regard to position" in the forward task and the  
447 "first few letters with regard to alphabetical order" in the alphabetical task. This post-hoc hypothesis was  
448 tested by an analysis of behavioral results with regards to the position of the probe letter. The factor Position  
449 was taken with 2 levels (the first two versus the last 2 letters for 5-letters conditions, or the first three versus  
450 the last 3 letters for 7-letters conditions). We found two significant interactions between Position and  
451 Group: Position x Group ( $F(1, 63) = 6.022, p = 0.017, \eta^2 = .087$ ) and Position x Task x Load x Group ( $F(1,$   
452  $63) = 3.183, p = 0.045, \eta^2 = .048$ ). Unfortunately, due to the post-hoc nature of this effect we could not



453 perform the EEG analysis with the factor Position, because we did not have a sufficient statistical power  
454 for this unplanned comparison.

455 Another explanation might be the loss of motivation in LP participants in the most challenging  
456 condition. This hypothesis, however, would predict a particularly poor performance of LP participants in  
457 the manipulation task with 7 letters. This disagrees with the observed data indicating nearly equal  
458 performance differences between LP and HP participants in all conditions (see Fig. 5). From our point of  
459 view, the strategy change hypothesis can better integrate this fact than the loss-of-motivation hypothesis.

460 Also Jaeggi et al. [2] came on the basis of their fMRI study to the same conclusion concerning the  
461 suboptimal strategies used by LP subjects in WM tasks. In that study, LP participants showed a positive  
462 correlation between task complexity and the amount of the broad activation in the frontal cortex. Obviously,  
463 the most challenging condition leads to the widely distributed engagement of the prefrontal cortex and  
464 results in the lack of neural resources for activation of the ACC necessary for the executive control of WM.

465

466 *Alpha*

467

468 In the development of the cortical idling hypothesis, [85] proposed that the increasing alpha activity  
469 during cognitive processing is related to the allocation of attentional resources by inhibition of the cortical  
470 areas irrelevant to the current task [42,86,87]. In this context alpha rhythm plays the role of an information  
471 flow filter.

472 It is well known that WM is one of the main components of general intelligence [88,89].  
473 Accordingly, the degree of alpha desynchronization in semantic memory task is positively related to  
474 intelligence [90]. Similar correlations between IQ and alpha power were observed in the resting state  
475 [91,92]. We suppose that stronger alpha power may reflect a higher level of readiness to perceive relevant  
476 information. Therefore, HP individuals have potentially more resourceful visual cortex and manage the  
477 tasks better [61].

478

479 *Beta1*

480

481 The main result was a stronger desynchronization of beta1 rhythm in the HP group in the  
482 manipulation condition in the left posterior area. An important role of the superior parietal cortex in flexible  
483 redistribution of attentional resources was demonstrated in several studies [93–96]. In terms of the two-  
484 buffer model (see above, Section General tendencies-Beta1), one may suggest that HP individuals are better  
485 able to shift their attention between the store of the originally presented set and the workspace where they  
486 work with the symbols. This might allow them to perform manipulations in the “workspace” buffer not  
487 spending too much resources for maintaining information in the “store” buffer.

488

489 *Beta2*

490

491 In the manipulation task, beta2 power increased in the HP group in the anterior areas, but in the LP  
492 group in the posterior areas. As we do not know any comparable data in the literature, only a very  
493 preliminary explanation can be proposed. Beta2 is the EEG index that may most simply be designated as  
494 “activation”. We believe, therefore, that changes in beta2 activity are not related to mental processes as  
495 such, but rather to the general volume of information necessarily used in these processes. This volume is  
496 expected to be larger in the manipulation task than in the retention task because during manipulation one  
497 has to work with at least two stimulus sets: the one that should be manipulated with and the one that results  
498 from the manipulation. The increase of frontal activity in HP participants may, therefore, reflect their ability  
499 to process a larger amount of information, whereas the heightened activity of sensory regions in LP subjects  
500 appears to reflect their need to frequently address the original stimulus set.

501

502 *General discussion*

503 In general, the obtained results allow us to make several claims about possible factors contributing,  
504 at the individual level, to effective verbal WM performance:

505 firstly, a higher state of readiness to process relevant and to inhibit irrelevant information and related  
506 larger alpha power;

507 secondly, stronger engagement of the left prefrontal cortex and the hippocampus; this factor can  
508 underlie efficient maintaining and manipulating information in WM due to a fast exchange of information  
509 between long term and working memory;

510 thirdly, an energy efficient strategy for distribution of frontal resources in order to maintain the  
511 necessary level of activity of the ACC;

512 finally, activation of the ACC and the related executive functions is decisive for successful  
513 manipulations of content in WM, simultaneous maintaining information about initial properties of stimuli  
514 and efficiently shifting attention between these cognitive operations.

515

## 516 **Limitations**

517

518 We have to acknowledge at least two limitations of the present study. Firstly, the results may be  
519 affected by the homogeneity of the sample in respect to gender (i.e., females). A gender based analysis will  
520 be the matter of a subsequent report Secondly, our putative explanation hypotheses suggested in the  
521 Discussion above have neuroanatomical implications, i.e., they presume the activity of certain brain  
522 structures such as the ACC. To test these hypotheses, a larger number of electrodes should be used in future  
523 studies, which will allow a more precise assessment of the spatial distribution of the obtained effects.

524

## 525 **Conclusions**

526

- 527 1. In accordance with many previous studies, we expected to find significant WM-related changes in  
528 alpha and theta frequency bands. This hypothesis was only partially supported by the data.  
529 Significant effects were found in all analyzed frequency bands from theta to high beta, indicating  
530 that our knowledge about the neural basis of WM is not comprehensive.
- 531 2. The hypothesis about a strong participation of the frontal theta rhythm in WM processes was  
532 confirmed. The novel finding was, however, different dynamics of frontal theta in HP and LP  
533 groups.
- 534 3. When starting the study, we believed that some important findings can have been missed in the  
535 previous experiments because they used only tasks of low to average difficulty. Therefore, we  
536 predicted important intergroup variation in EEG pattern in the most challenging condition. This  
537 prediction was confirmed. The most pronounced differences between individuals with high and low  
538 WM performance, in terms of the oscillatory activity in several frequency ranges, were observed in  
539 the manipulation task with 7 letters, which is a very difficult condition that for many individuals  
540 might exceed their limits. Particularly, this condition resulted in a more complex change of theta  
541 activity than just an increase with WM load, which has not been observed so far. Including greater  
542 variety of experimental conditions and groups to the WM research agenda seems beneficial.
- 543 4. Finally, we expected a stronger effect of executive WM components as compared with storage  
544 components. The data put this hypothesis in question. Firstly, the difference in performance between  
545 LP and HP participants was nearly equal in retention (weak executive control demands) and  
546 manipulation (much higher executive control demands) conditions. Secondly, task and site  
547 dependent group differences were found in each explored frequency bands including anterior theta  
548 and posterior alpha activity. In some studies these two responses were interpreted as reflections of  
549 executive and storage components of WM, respectively [5,6]. Although there is an alternative  
550 interpretation on the basis of cross-frequency coupling [7,8], all these observations together may

551 indicate that the two components of WM are equally important for WM performance at the  
552 individual level. More studies are needed to clarify this issue

553

## 554 **Declarations**

## 555 **Abbreviations**

556 WM: working memory

557 HP: high performance

558 LP: low performance

559 tACS: transcranial alternating current stimulation

560 FMT: frontal midline theta rhythm

561 EEG: electroencephalography

562 EOG: electrooculography

563 IAF: individual alpha frequency

564 FFT: fast Fourier transformation

565 ICA: independent component analysis

566 ROI: region of interest

567 SEM: standard error of the mean

568 IFG: inferior frontal gyrus

569 fMRI: functional magnetic resonance imaging

570 ACC: anterior cingulate cortex

571 IQ: intelligence quotient

572 ANOVA: analysis of variance

573

## 574 **Ethics approval and consent to participate**

575 Informed consent was obtained from all subjects prior to the study. The study was approved by the Ural  
576 Federal University Ethics Committee.

577

578 **Consent for publication**

579 Not applicable.

580

581 **Availability of data and materials**

582 The datasets analyzed during the current study is available from the corresponding author on reasonable  
583 request.

584

585 **Competing interests**

586 The authors declare that they have no competing interests.

587

588 **Funding**

589 We acknowledge support by the Deutsche Forschungsgemeinschaft and Open Access Publishing Fund of  
590 University of Tübingen

591

592 **Authors' contributions**

593 **YGP:** conceived of the study, designed the experimental paradigm, carried out the recording of the data,  
594 performed the statistical analysis and drafted the manuscript

595 **BK:** contributed to the discussion, and to the preparation of the manuscript

596 All authors read and approved the final manuscript.

597

598 **Acknowledgements**

599 Not applicable.

600 **References**

601

- 602 1. Daffner KR, Chong H, Sun X, Tarbi EC, Riis JL, McGinnis SM, et al. Mechanisms Underlying Age-  
603 and Performance-related Differences in Working Memory. *J. Cogn. Neurosci.* 2011;23:1298–314.
- 604 2. Jaeggi SM, Buschkuhl M, Etienne A, Ozdoba C, Perrig WJ, Nirkko AC. On how high performers  
605 keep cool brains in situations of cognitive overload. *Cogn. Affect. Behav. Neurosci.* 2007;7:75–89.
- 606 3. Onton J, Delorme A, Makeig S. Frontal midline EEG dynamics during working memory. *NeuroImage.*  
607 2005;27:341–56.
- 608 4. Pesonen M, Hämäläinen H, Krause CM. Brain oscillatory 4–30 Hz responses during a visual n-back  
609 memory task with varying memory load. *Brain Res.* 2007;1138:171–7.
- 610 5. Kawasaki M, Kitajo K, Yamaguchi Y. Dynamic links between theta executive functions and alpha  
611 storage buffers in auditory and visual working memory. *Eur. J. Neurosci.* 2010;31:1683–9.
- 612 6. Dimitriadis SI, Sun Y, Kwok K, Laskaris NA, Thakor N, Bezerianos A. Cognitive Workload  
613 Assessment Based on the Tensorial Treatment of EEG Estimates of Cross-Frequency Phase Interactions.  
614 *Ann. Biomed. Eng.* 2015;43:977–89.
- 615 7. Axmacher N, Henseler MM, Jensen O, Weinreich I, Elger CE, Fell J. Cross-frequency coupling  
616 supports multi-item working memory in the human hippocampus. *Proc. Natl. Acad. Sci.* 2010;107:3228–  
617 33.
- 618 8. Canolty RT, Knight RT. The functional role of cross-frequency coupling. *Trends Cogn. Sci.*  
619 2010;14:506–515.

- 620 9. Gevins A, Smith ME, McEvoy L, Yu D. High-resolution EEG mapping of cortical activation related to  
621 working memory: effects of task difficulty, type of processing, and practice. *Cereb. Cortex.* 1997;7:374–  
622 385.
- 623 10. Itthipuripat S, Wessel JR, Aron AR. Frontal theta is a signature of successful working memory  
624 manipulation. *Exp. Brain Res.* 2012;224:255–62.
- 625 11. Missonnier P, Deiber M-P, Gold G, Millet P, Pun MG-F, Fazio-Costa L, et al. Frontal theta event-  
626 related synchronization: comparison of directed attention and working memory load effects. *J. Neural*  
627 *Transm. Springer;* 2006;113:1477–86.
- 628 12. Daneman M, Merikle PM. Working memory and language comprehension: A meta-analysis. *Psychon.*  
629 *Bull. Rev.* 1996;3:422–33.
- 630 13. D’Esposito M. From cognitive to neural models of working memory. *Philos. Trans. R. Soc. B Biol.*  
631 *Sci.* 2007;362:761–72.
- 632 14. Hyun J-S, Luck SJ. Visual working memory as the substrate for mental rotation. *Psychon. Bull. Rev.*  
633 2007;14:154–158.
- 634 15. Baddeley A. Working Memory: Theories, Models, and Controversies. *Annu. Rev. Psychol.*  
635 2012;63:1–29.
- 636 16. Baddeley A. Working memory: looking back and looking forward. *Nat. Rev. Neurosci.* 2003;4:829–  
637 39.
- 638 17. Engle RW, Tuholski SW, Laughlin JE, Conway AR. Working memory, short-term memory, and  
639 general fluid intelligence: a latent-variable approach. *J. Exp. Psychol. Gen.* 1999;128:309.



- 640 18. Postle BR. Working memory as an emergent property of the mind and brain. *Neuroscience*.  
641 2006;139:23–38.
- 642 19. Nee DE, Brown JW, Askren MK, Berman MG, Demiralp E, Krawitz A, et al. A Meta-analysis of  
643 Executive Components of Working Memory. *Cereb. Cortex*. 2013;23:264–82.
- 644 20. Cohen JD, Perlstein WM, Braver TS, Nystrom LE, Noll DC, Jonides J, et al. Temporal dynamics of  
645 brain activation during a working memory task. *Nature*. 1997;386:604–8.
- 646 21. Edin F, Klingberg T, Johansson P, McNab F, Tegnér J, Compte A. Mechanism for top-down control  
647 of working memory capacity. *Proc. Natl. Acad. Sci*. 2009;106:6802–6807.
- 648 22. Klingberg T, O’Sullivan BT, Roland PE. Bilateral activation of fronto-parietal networks by  
649 incrementing demand in a working memory task. *Cereb. Cortex*. 1997;7:465–471.
- 650 23. Linden DEJ, Bittner RA, Muckli L, Waltz JA, Kriegeskorte N, Goebel R, et al. Cortical capacity  
651 constraints for visual working memory: dissociation of fMRI load effects in a fronto-parietal network.  
652 *NeuroImage*. 2003;20:1518–30.
- 653 24. Palva JM, Monto S, Kulashekhar S, Palva S. Neuronal synchrony reveals working memory networks  
654 and predicts individual memory capacity. *Proc. Natl. Acad. Sci*. 2010;107:7580–5.
- 655 25. Ekman M, Fiebach CJ, Melzer C, Tittgemeyer M, Derrfuss J. Different Roles of Direct and Indirect  
656 Frontoparietal Pathways for Individual Working Memory Capacity. *J. Neurosci*. 2016;36:2894–903.
- 657 26. Buzsaki G. Neuronal Oscillations in Cortical Networks. *Science*. 2004;304:1926–9.
- 658 27. Aftanas LI, Golocheikine S a. Human anterior and frontal midline theta and lower alpha reflect  
659 emotionally positive state and internalized attention: high-resolution EEG investigation of meditation.  
660 *Neurosci. Lett*. 2001;310:57–60.

- 661 28. Jensen O, Tesche CD. Frontal theta activity in humans increases with memory load in a working  
662 memory task. *Eur. J. Neurosci.* 2002;15:1395–1399.
- 663 29. Sauseng P, Klimesch W, Schabus M, Doppelmayr M. Fronto-parietal EEG coherence in theta and  
664 upper alpha reflect central executive functions of working memory. *Int. J. Psychophysiol.* 2005;57:97–  
665 103.
- 666 30. Sauseng P, Griesmayr B, Freunberger R, Klimesch W. Control mechanisms in working memory: A  
667 possible function of EEG theta oscillations. *Neurosci. Biobehav. Rev.* 2010;34:1015–22.
- 668 31. Berger B, Minarik T, Griesmayr B, Stelzig-Schoeler R, Aichhorn W, Sauseng P. Brain Oscillatory  
669 Correlates of Altered Executive Functioning in Positive and Negative Symptomatic Schizophrenia  
670 Patients and Healthy Controls. *Psychopathology.* 2016;705.
- 671 32. Berger B, Omer S, Minarik T, Sterr A, Sauseng P. Interacting Memory Systems—Does EEG Alpha  
672 Activity Respond to Semantic Long-Term Memory Access in a Working Memory Task? *Biology.*  
673 2014;4:1–16.
- 674 33. Griesmayr B, Gruber WR, Klimesch W, Sauseng P. Human frontal midline theta and its  
675 synchronization to gamma during a verbal delayed match to sample task. *Neurobiol. Learn. Mem.*  
676 2010;93:208–15.
- 677 34. Cooper PS, Wong ASW, Fulham WR, Thienel R, Mansfield E, Michie PT, et al. Theta frontoparietal  
678 connectivity associated with proactive and reactive cognitive control processes. *NeuroImage.*  
679 2015;108:354–63.
- 680 35. Sarnthein J, Petsche H, Rappelsberger P, Shaw GL, Von Stein A. Synchronization between prefrontal  
681 and posterior association cortex during human working memory. *Proc. Natl. Acad. Sci.* 1998;95:7092–  
682 7096.

- 683 36. Wu X, Chen X, Li Z, Han S, Zhang D. Binding of verbal and spatial information in human working  
684 memory involves large-scale neural synchronization at theta frequency. *NeuroImage*. 2007;35:1654–62.
- 685 37. Polanía R, Nitsche MA, Korman C, Batsikadze G, Paulus W. The Importance of Timing in  
686 Segregated Theta Phase-Coupling for Cognitive Performance. *Curr. Biol*. 2012;22:1314–8.
- 687 38. Klimesch W. Alpha-band oscillations, attention, and controlled access to stored information. *Trends*  
688 *Cogn. Sci.* 2012;16:606–617.
- 689 39. Sauseng P, Klimesch W, Heise KF, Gruber WR, Holz E, Karim AA, et al. Brain Oscillatory  
690 Substrates of Visual Short-Term Memory Capacity. *Curr. Biol*. 2009;19:1846–52.
- 691 40. Tuladhar AM, Huurne N ter, Schoffelen J-M, Maris E, Oostenveld R, Jensen O. Parieto-occipital  
692 sources account for the increase in alpha activity with working memory load. *Hum. Brain Mapp*.  
693 2007;28:785–92.
- 694 41. Jensen O, Mazaheri A. Shaping Functional Architecture by Oscillatory Alpha Activity: Gating by  
695 Inhibition. *Front. Hum. Neurosci.* [Internet]. 2010 [cited 2016 May 23];4. Available from:  
696 <http://journal.frontiersin.org/article/10.3389/fnhum.2010.00186/abstract>
- 697 42. Klimesch W, Sauseng P, Hanslmayr S. EEG alpha oscillations: The inhibition–timing hypothesis.  
698 *Brain Res. Rev.* 2007;53:63–88.
- 699 43. Deiber M-P, Missonnier P, Bertrand O, Gold G, Fazio-Costa L, Ibanez V, et al. Distinction between  
700 perceptual and attentional processing in working memory tasks: a study of phase-locked and induced  
701 oscillatory brain dynamics. *Cogn. Neurosci. J. Of.* 2007;19:158–172.
- 702 44. Siegel M, Warden MR, Miller EK. Phase-dependent neuronal coding of objects in short-term  
703 memory. *Proc. Natl. Acad. Sci.* 2009;106:21341–21346.

- 704 45. Tallon-Baudry C, Bertrand O, Peronnet F, Pernier J. Induced  $\gamma$ -Band Activity during the Delay of a  
705 Visual Short-Term Memory Task in Humans. *J. Neurosci.* 1998;18:4244–54.
- 706 46. Barrett LF, Tugade MM, Engle RW. Individual Differences in Working Memory Capacity and Dual-  
707 Process Theories of the Mind. *Psychol. Bull.* 2004;130:553–73.
- 708 47. Engle RW, Kane MJ. Executive attention, working memory capacity, and a two-factor theory of  
709 cognitive control. *Psychol. Learn. Motiv.* 2004;44:145–200.
- 710 48. Unsworth N, Spillers GJ. Working memory capacity: Attention control, secondary memory, or both?  
711 A direct test of the dual-component model. *J. Mem. Lang.* 2010;62:392–406.
- 712 49. Brouwer A-M, Hogervorst MA, van Erp JBF, Heffelaar T, Zimmerman PH, Oostenveld R. Estimating  
713 workload using EEG spectral power and ERPs in the n-back task. *J. Neural Eng.* 2012;9:045008.
- 714 50. Dong S, Reder LM, Yao Y, Liu Y, Chen F. Individual differences in working memory capacity are  
715 reflected in different ERP and EEG patterns to task difficulty. *Brain Res.* 2015;1616:146–56.
- 716 51. Gevins A, Smith ME. Neurophysiological Measures of Working Memory and Individual Differences  
717 in Cognitive Ability and Cognitive Style. *Cereb. Cortex.* 2000;10:829–39.
- 718 52. Griesmayr B, Berger B, Stelzig-Schoeler R, Aichhorn W, Bergmann J, Sauseng P. EEG theta phase  
719 coupling during executive control of visual working memory investigated in individuals with  
720 schizophrenia and in healthy controls. *Cogn. Affect. Behav. Neurosci.* 2014;14:1340–55.
- 721 53. Meltzer JA, Negishi M, Mayes LC, Constable RT. Individual differences in EEG theta and alpha  
722 dynamics during working memory correlate with fMRI responses across subjects. *Clin. Neurophysiol.*  
723 2007;118:2419–2436.

- 724 54. Michels L, Bucher K, Lüchinger R, Klaver P, Martin E, Jeanmonod D, et al. Simultaneous EEG-fMRI  
725 during a Working Memory Task: Modulations in Low and High Frequency Bands. PLoS ONE.  
726 2010;5:e10298.
- 727 55. Scheeringa R, Petersson KM, Oostenveld R, Norris DG, Hagoort P, Bastiaansen MCM. Trial-by-trial  
728 coupling between EEG and BOLD identifies networks related to alpha and theta EEG power increases  
729 during working memory maintenance. NeuroImage. 2009;44:1224–38.
- 730 56. Tsujimoto T, Shimazu H, Isomura Y, Sasaki K. Theta Oscillations in Primate Prefrontal and Anterior  
731 Cingulate Cortices in Forewarned Reaction Time Tasks. J. Neurophysiol. 2010;103:827–43.
- 732 57. Bush G, Luu P, Posner MI. Cognitive and emotional influences in anterior cingulate cortex. Trends  
733 Cogn. Sci. 2000;4:215–222.
- 734 58. Niendam TA, Laird AR, Ray KL, Dean YM, Glahn DC, Carter CS. Meta-analytic evidence for a  
735 superordinate cognitive control network subserving diverse executive functions. Cogn. Affect. Behav.  
736 Neurosci. 2012;12:241–68.
- 737 59. Shenhav A, Botvinick MM, Cohen JD. The Expected Value of Control: An Integrative Theory of  
738 Anterior Cingulate Cortex Function. Neuron. 2013;79:217–40.
- 739 60. Sauseng P, Hoppe J, Klimesch W, Gerloff C, Hummel FC. Dissociation of sustained attention from  
740 central executive functions: local activity and interregional connectivity in the theta range. Eur. J.  
741 Neurosci. 2007;25:587–93.
- 742 61. Klimesch W, Vogt F, Doppelmayr M. Interindividual differences in alpha and theta power reflect  
743 memory performance. Intelligence. 1999;27:347–362.
- 744 62. Maurer U, Brem S, Liechti M, Maurizio S, Michels L, Brandeis D. Frontal Midline Theta Reflects  
745 Individual Task Performance in a Working Memory Task. Brain Topogr. 2015;28:127–34.

- 746 63. Michels L, Moazami-Goudarzi M, Jeanmonod D, Sarnthein J. EEG alpha distinguishes between  
747 cuneal and precuneal activation in working memory. *NeuroImage*. 2008;40:1296–310.
- 748 64. Babiloni C, Babiloni F, Carducci F, Cappa SF, Cincotti F, Del Percio C, et al. Human cortical  
749 rhythms during visual delayed choice reaction time tasks. *Behav. Brain Res*. 2004;153:261–71.
- 750 65. Liu Z-X, Glizer D, Tannock R, Woltering S. EEG alpha power during maintenance of information in  
751 working memory in adults with ADHD and its plasticity due to working memory training: A randomized  
752 controlled trial. *Clin. Neurophysiol*. 2016;127:1307–20.
- 753 66. Engel AK, Fries P. Beta-band oscillations—signalling the status quo? *Curr. Opin. Neurobiol*.  
754 2010;20:156–65.
- 755 67. Weiss S, Mueller HM. “Too Many betas do not Spoil the Broth”: The Role of Beta Brain Oscillations  
756 in Language Processing. *Front. Psychol*. [Internet]. 2012 [cited 2016 May 14];3. Available from:  
757 <http://journal.frontiersin.org/article/10.3389/fpsyg.2012.00201/abstract>
- 758 68. Weiss S, Rappelsberger P. Long-range EEG synchronization during word encoding correlates with  
759 successful memory performance. *Cogn. Brain Res*. 2000;9:299–312.
- 760 69. Leiberg S, Lutzenberger W, Kaiser J. Effects of memory load on cortical oscillatory activity during  
761 auditory pattern working memory. *Brain Res*. 2006;1120:131–40.
- 762 70. Hanslmayr S, Matuschek J, Fellner M-C. Entrainment of Prefrontal Beta Oscillations Induces an  
763 Endogenous Echo and Impairs Memory Formation. *Curr. Biol*. 2014;24:904–9.
- 764 71. Zanto TP, Gazzaley A. Neural Suppression of Irrelevant Information Underlies Optimal Working  
765 Memory Performance. *J. Neurosci*. 2009;29:3059–66.

- 766 72. Shahin AJ, Picton TW, Miller LM. Brain oscillations during semantic evaluation of speech. *Brain*  
767 *Cogn.* 2009;70:259–66.
- 768 73. Spitzer B, Blankenburg F. Supramodal Parametric Working Memory Processing in Humans. *J.*  
769 *Neurosci.* 2012;32:3287–95.
- 770 74. Spitzer B, Gloel M, Schmidt TT, Blankenburg F. Working Memory Coding of Analog Stimulus  
771 Properties in the Human Prefrontal Cortex. *Cereb. Cortex.* 2014;24:2229–36.
- 772 75. Benchenane K, Tiesinga PH, Battaglia FP. Oscillations in the prefrontal cortex: a gateway to memory  
773 and attention. *Curr. Opin. Neurobiol.* 2011;21:475–85.
- 774 76. Sammer G, Blecker C, Gebhardt H, Bischoff M, Stark R, Morgen K, et al. Relationship between  
775 regional hemodynamic activity and simultaneously recorded EEG-theta associated with mental  
776 arithmetic-induced workload. *Hum. Brain Mapp.* 2007;28:793–803.
- 777 77. Hyman JM, Zilli EA, Paley AM, Hasselmo ME. Working Memory Performance Correlates with  
778 Prefrontal-Hippocampal Theta Interactions but not with Prefrontal Neuron Firing Rates. *Front. Integr.*  
779 *Neurosci.* [Internet]. 2010 [cited 2016 May 26];4. Available from:  
780 <http://www.ncbi.nlm.nih.gov/pmc/articles/PMC2861479/>
- 781 78. Jones MW, Wilson MA. Theta Rhythms Coordinate Hippocampal–Prefrontal Interactions in a Spatial  
782 Memory Task. *PLOS Biol.* 2005;3:e402.
- 783 79. Cashdollar N, Malecki U, Rugg-Gunn FJ, Duncan JS, Lavie N, Duzel E. Hippocampus-dependent  
784 and-independent theta-networks of active maintenance. *Proc. Natl. Acad. Sci.* 2009;106:20493–20498.
- 785 80. Eckart C, Fuentemilla L, Bauch EM, Bunzeck N. Dopaminergic stimulation facilitates working  
786 memory and differentially affects prefrontal low theta oscillations. *NeuroImage.* 2014;94:185–92.

- 787 81. Jeneson A, Squire LR. Working memory, long-term memory, and medial temporal lobe function.  
788 Learn. Mem. 2011;19:15–25.
- 789 82. Nelson J, Reuter-Lorenz PA, Persson J, Sylvester C-YC, Jonides J. Mapping interference resolution  
790 across task domains: A shared control process in left inferior frontal gyrus. Brain Res. 2009;1256:92–100.
- 791 83. Zhang JX, Feng C-M, Fox PT, Gao J-H, Tan LH. Is left inferior frontal gyrus a general mechanism  
792 for selection? NeuroImage. 2004;23:596–603.
- 793 84. Chee MWL, Choo WC. Functional Imaging of Working Memory after 24 Hr of Total Sleep  
794 Deprivation. J. Neurosci. 2004;24:4560–7.
- 795 85. Pfurtscheller G, Stancak A, Neuper C. Event-related synchronization (ERS) in the alpha band—an  
796 electrophysiological correlate of cortical idling: a review. Int. J. Psychophysiol. 1996;24:39–46.
- 797 86. Brunia CHM, Van Boxtel GJM. Wait and see. Int. J. Psychophysiol. Elsevier; 2001;43:59–75.
- 798 87. Pfurtscheller G, Neuper C, Flotzinger D, Pregenzer M. EEG-based discrimination between  
799 imagination of right and left hand movement. Electroencephalogr. Clin. Neurophysiol. Elsevier;  
800 1997;103:642–51.
- 801 88. Conway AR, Cowan N, Bunting MF, Theriault DJ, Minkoff SR. A latent variable analysis of  
802 working memory capacity, short-term memory capacity, processing speed, and general fluid intelligence.  
803 Intelligence. 2002;30:163–183.
- 804 89. Kane MJ, Hambrick DZ, Conway ARA. Working Memory Capacity and Fluid Intelligence Are  
805 Strongly Related Constructs: Comment on Ackerman, Beier, and Boyle (2005). Psychol. Bull.  
806 2005;131:66–71.



- 807 90. Doppelmayr M, Klimesch W, Hödlmoser K, Sauseng P, Gruber W. Intelligence related upper alpha  
808 desynchronization in a semantic memory task. *Brain Res. Bull.* 2005;66:171–7.
- 809 91. Doppelmayr M, Klimesch W, Stadler W, Poellhuber D, Heine C. EEG alpha power and intelligence.  
810 *Intelligence.* 2002;30:289–302.
- 811 92. Jaušovec N. Differences in EEG alpha activity related to giftedness. *Intelligence.* 1996;23:159–173.
- 812 93. Koenigs M, Barbey AK, Postle BR, Grafman J. Superior Parietal Cortex Is Critical for the  
813 Manipulation of Information in Working Memory. *J. Neurosci.* 2009;29:14980–6.
- 814 94. Molenberghs P, Mesulam MM, Peeters R, Vandenberghe RRC. Remapping Attentional Priorities:  
815 Differential Contribution of Superior Parietal Lobule and Intraparietal Sulcus. *Cereb. Cortex.*  
816 2007;17:2703–12.
- 817 95. Shomstein S, Yantis S. Control of Attention Shifts between Vision and Audition in Human Cortex. *J.*  
818 *Neurosci.* 2004;24:10702–6.
- 819 96. Yantis S, Schwarzbach J, Serences JT, Carlson RL, Steinmetz MA, Pekar JJ, et al. Transient neural  
820 activity in human parietal cortex during spatial attention shifts. *Nat. Neurosci.* 2002;5:995–1002.
- 821
- 822
- 823
- 824
- 825
- 826
- 827
- 828

829

830

### 831 **Figure Legends**

832 Fig. 1 Examples of the trials.

833 Fig. 2 Mean accuracy in different WM tasks and conditions. Notes. 5R, 6R, 7R – memorizing 5, 6, or 7  
834 letters in forward order (Retention condition); 5M, 6M, 7M – memorizing 5, 6, or 7 letters in alphabetical  
835 order (Manipulation condition).

836 Fig. 3 General tendencies of theta power for Retention and Manipulation tasks (A) over the Left and  
837 Right hemispheres and (B) in Anterior and Posterior areas. Error bars depict Standard Error of the Mean  
838 (SEM).

839 Fig. 4 Beta1 power chart and corresponding topograms for Retention and Manipulation tasks. Error bars  
840 depict SEM.

841 Fig. 5 (A) Midline theta power for four WM tasks and (B, C) corresponding topograms in two groups.  
842 Notes: 5R, 7R – 5 and 7 letters Retention conditions; 5M, 7M – 5 and 7 letters Manipulation conditions.  
843 Error bars depict SEM.

844 Fig. 6 Alpha1 power for Retention and Manipulation tasks in Low and High performance groups. Error  
845 bars depict SEM.

846 Fig. 7 (A) Beta1 power in the left posterior area for Retention and Manipulation tasks and corresponding  
847 topograms (B) in Low performance (LP) and (C) High performance (HP) groups. Error bars depict SEM

848 Fig. 8 Beta2 power for Retention and Manipulation tasks in Low and High performance groups in  
849 Anterior and Posterior areas. Error bars depict SEM.

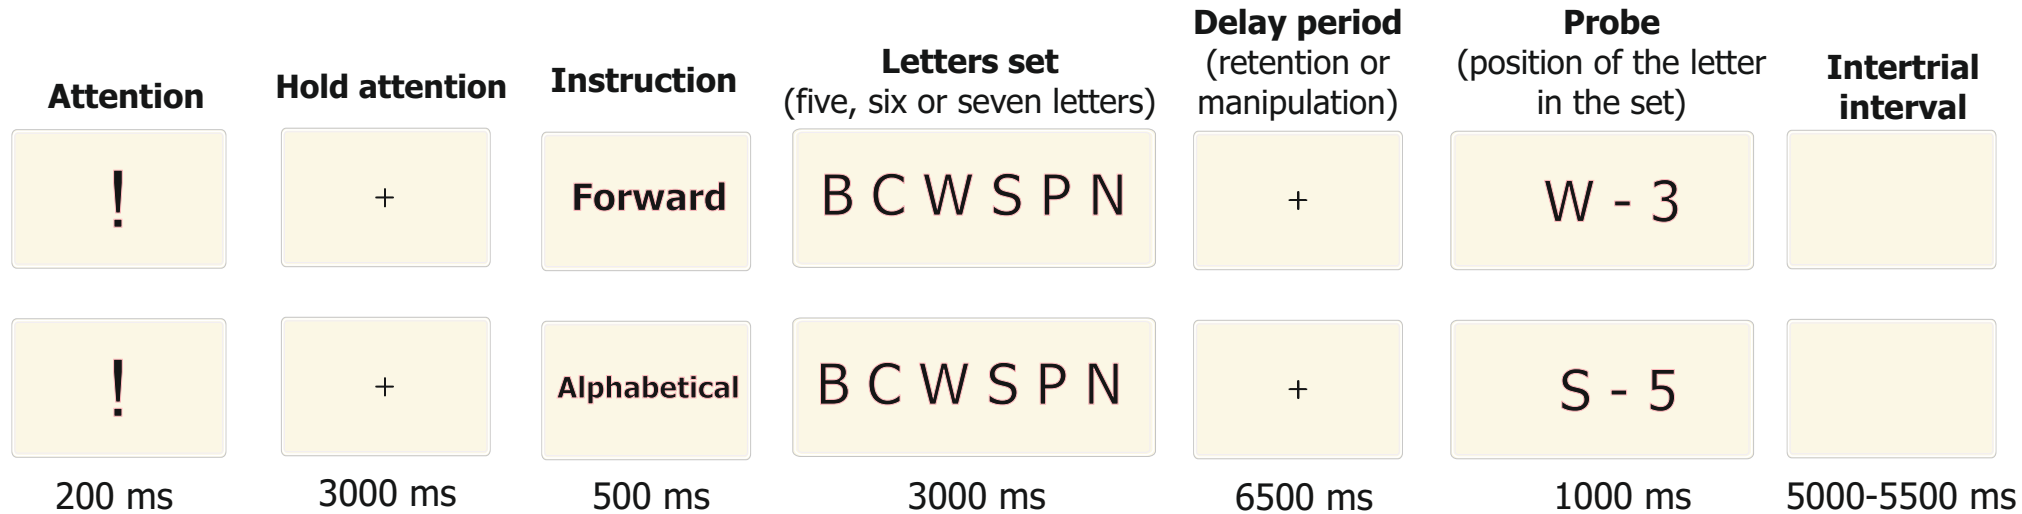

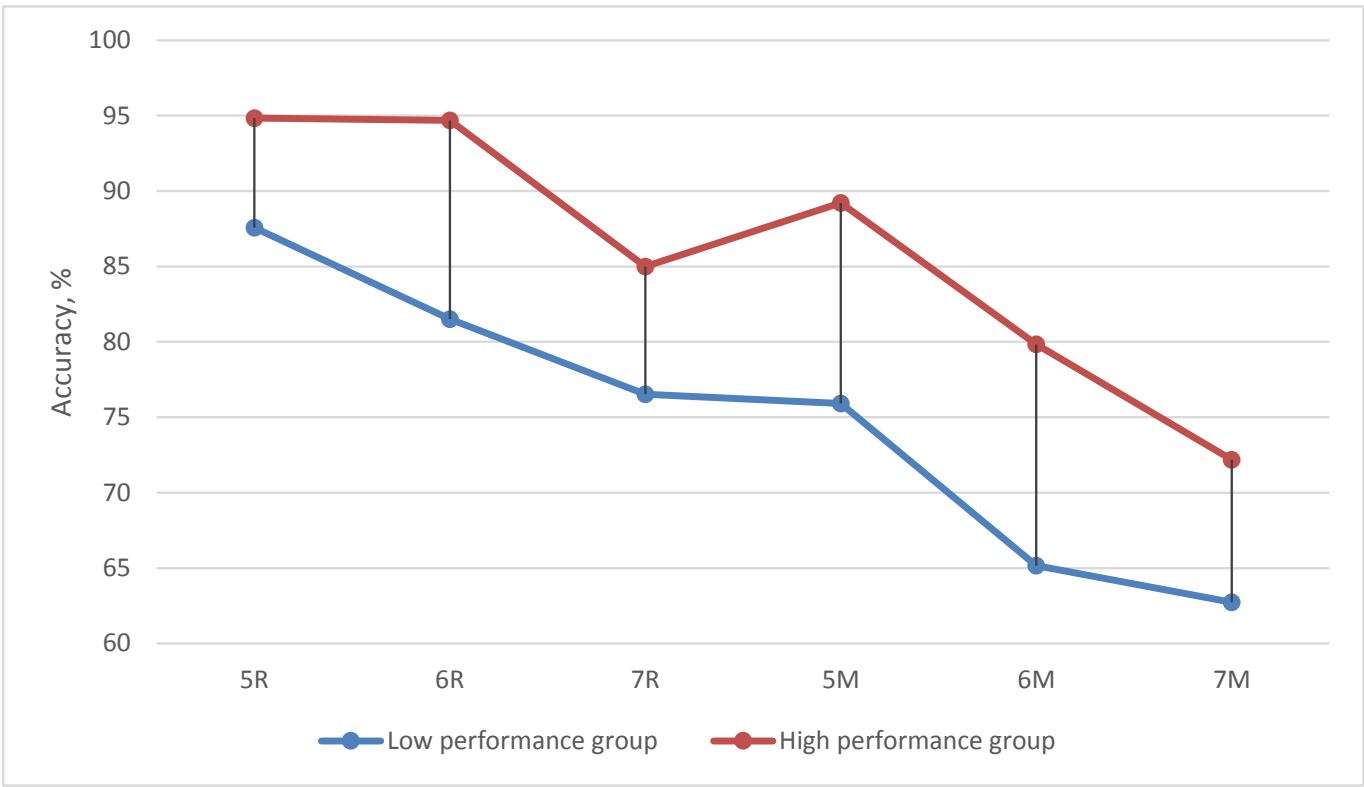

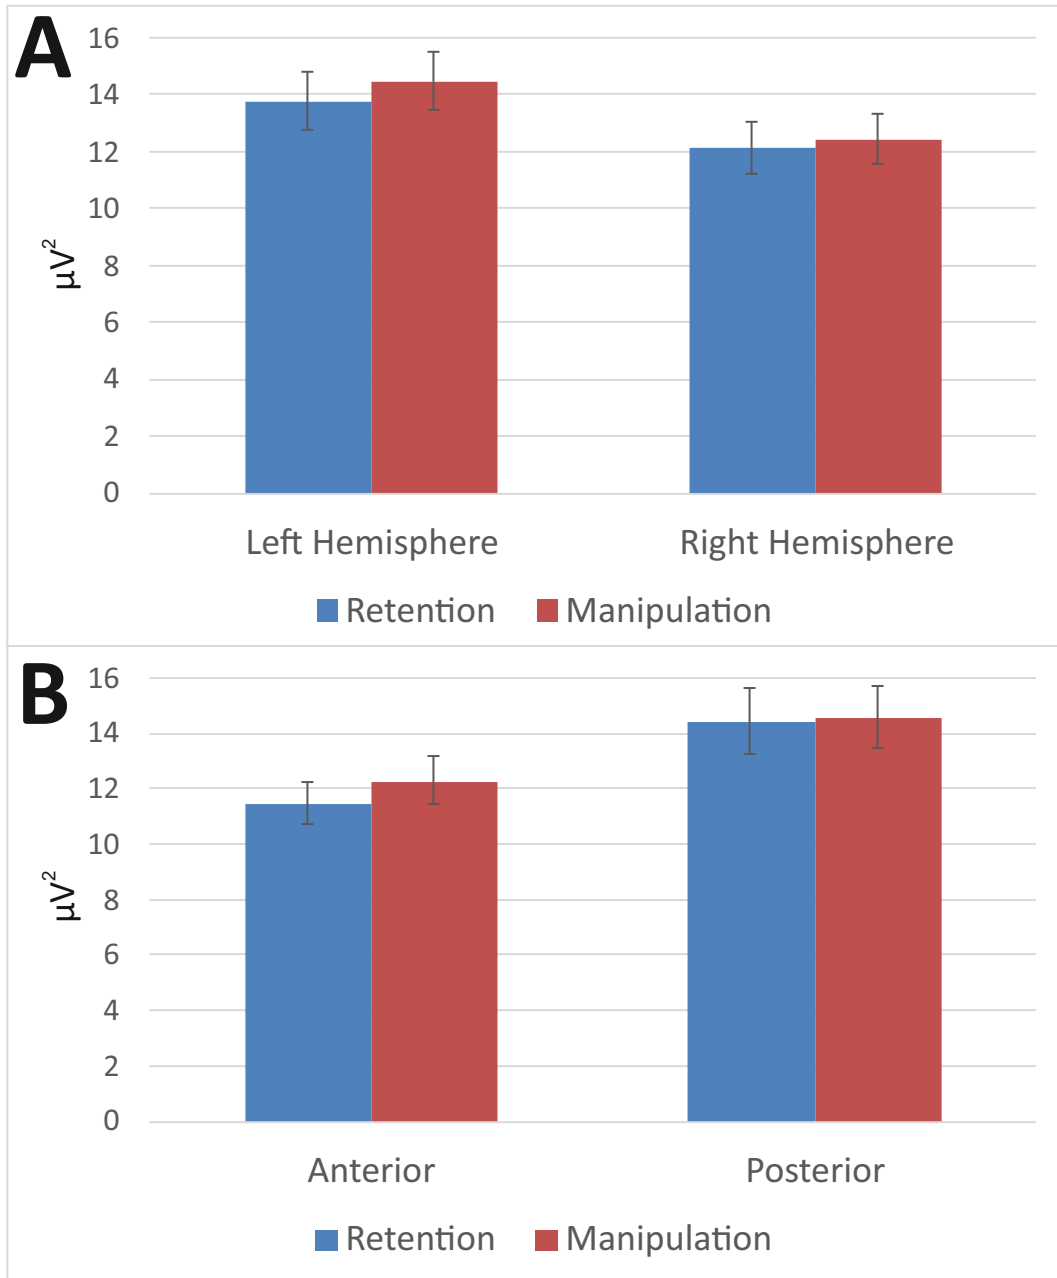

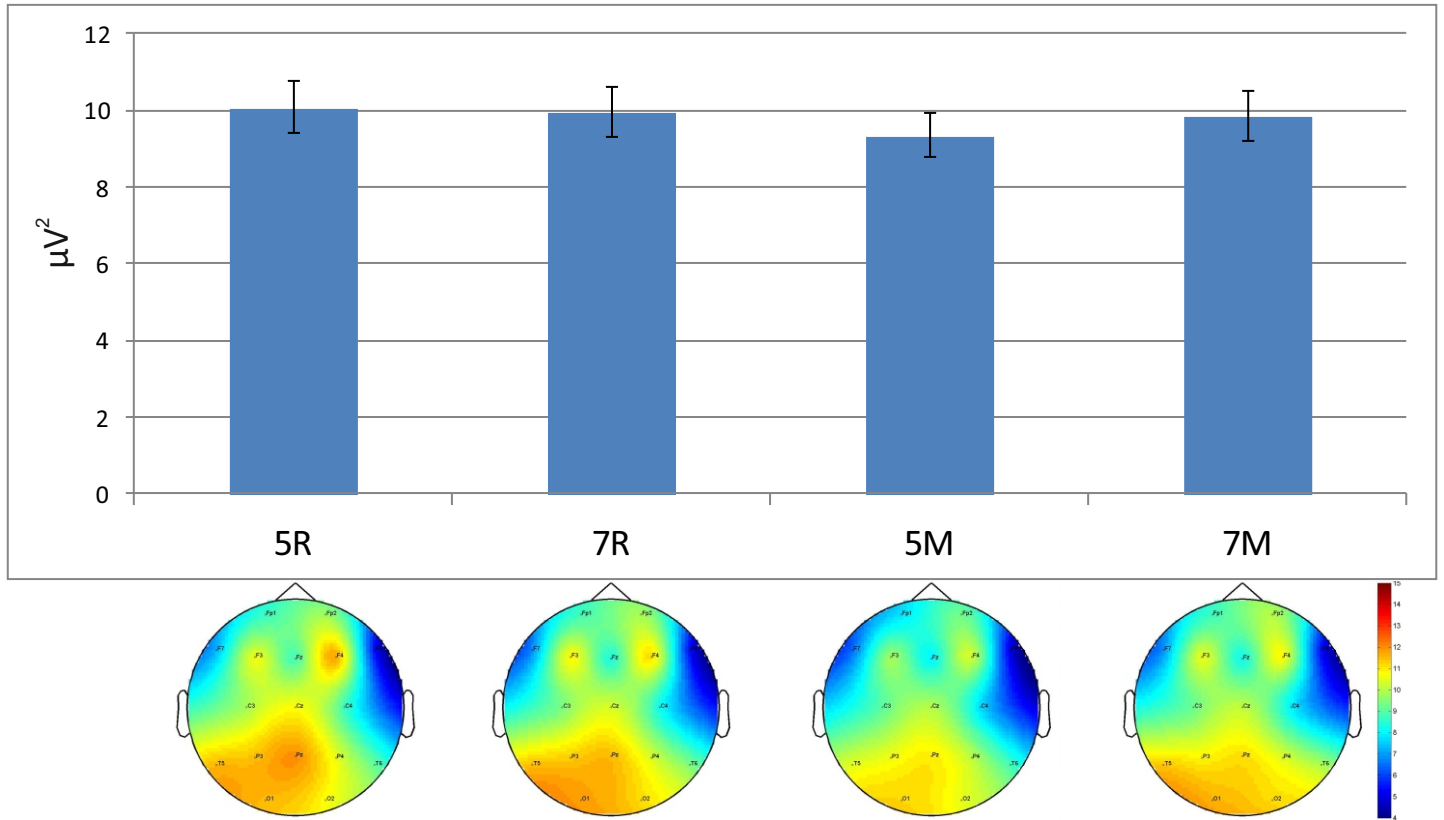

# A

## Low performance group

## High performance group

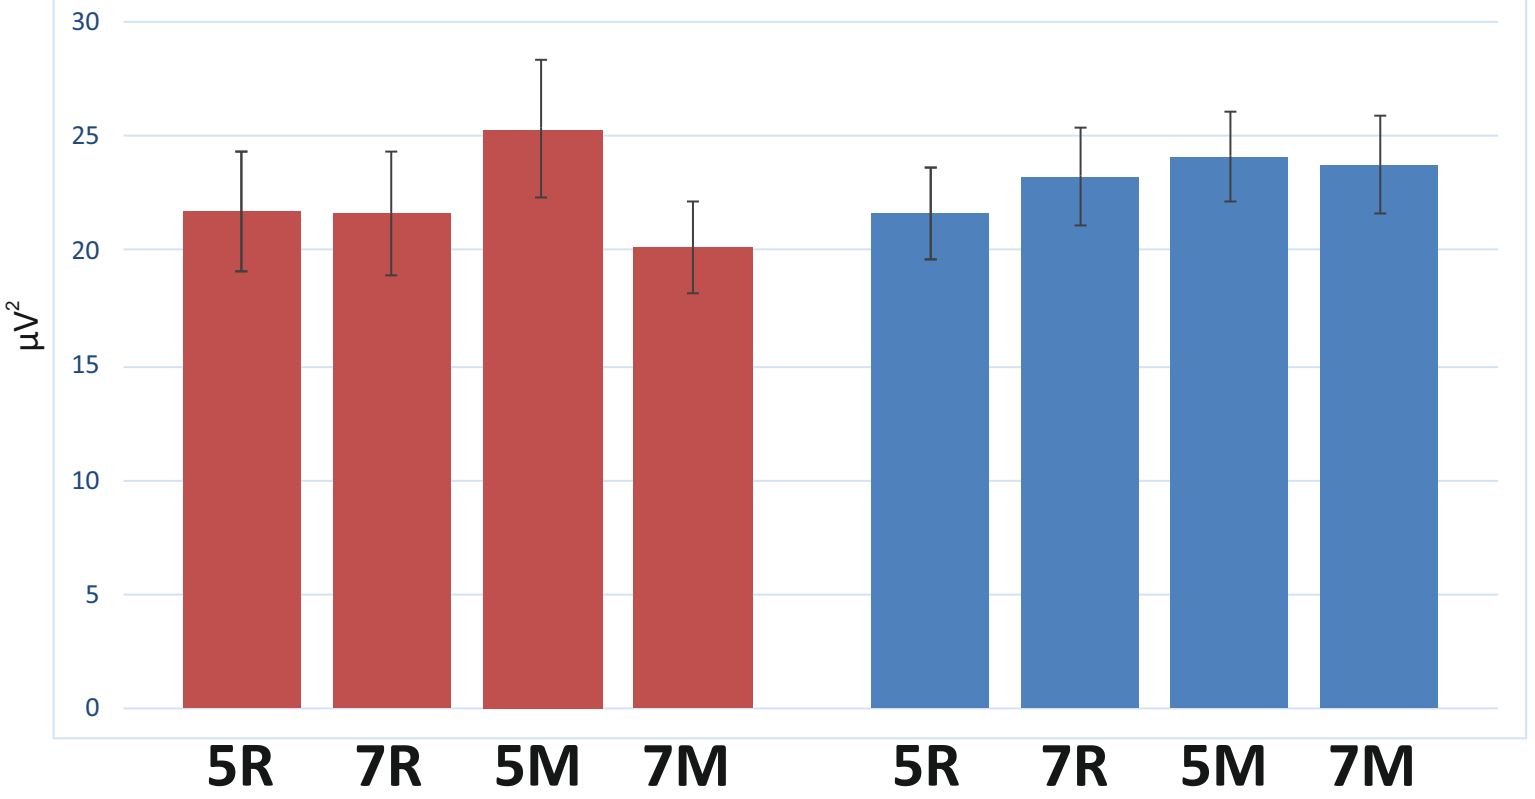

# B

## High performance group

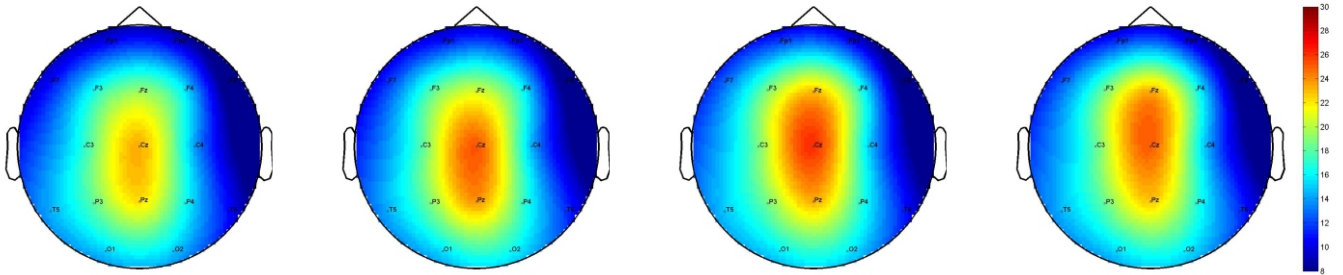

# C

## Low performance group

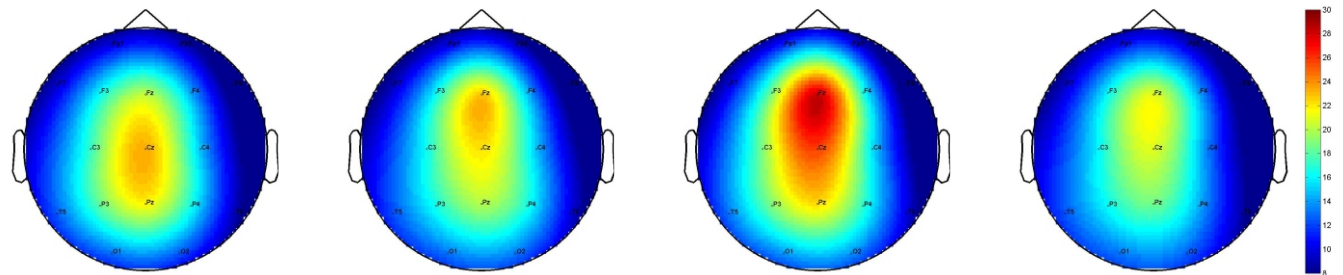

5R

7R

5M

7M

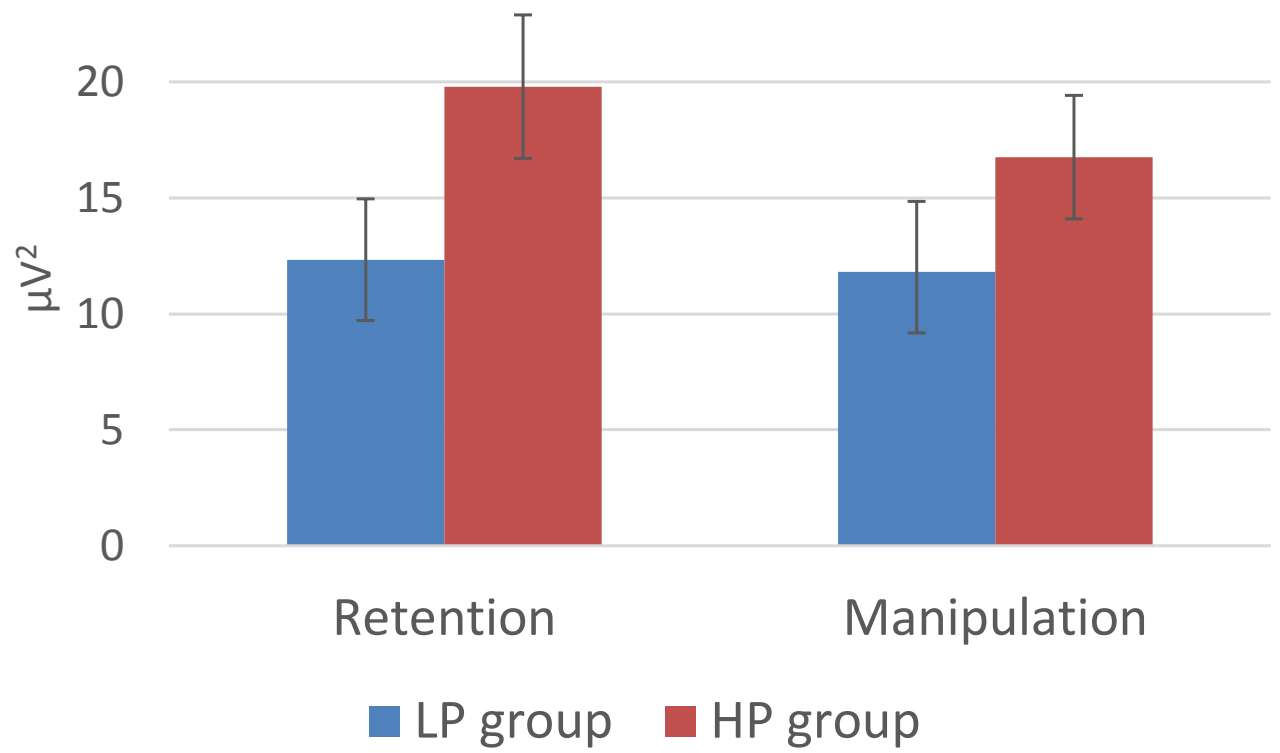



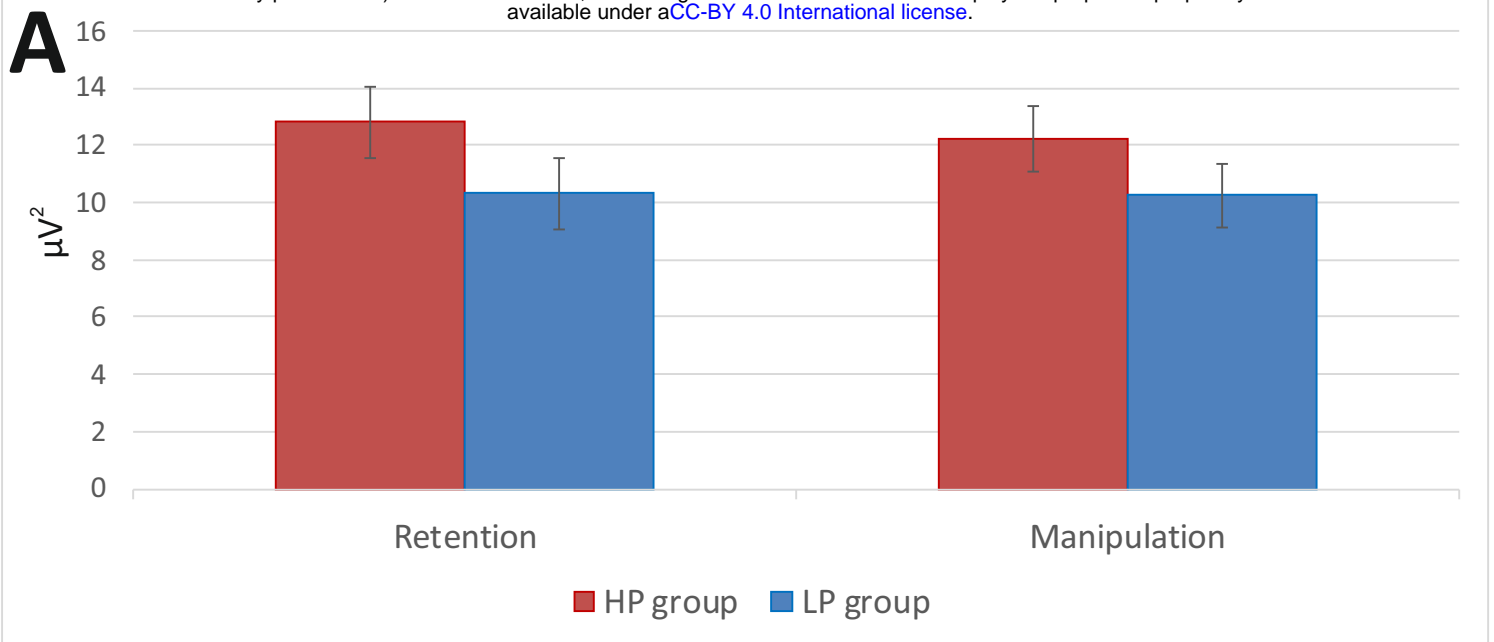

**B** High performance group

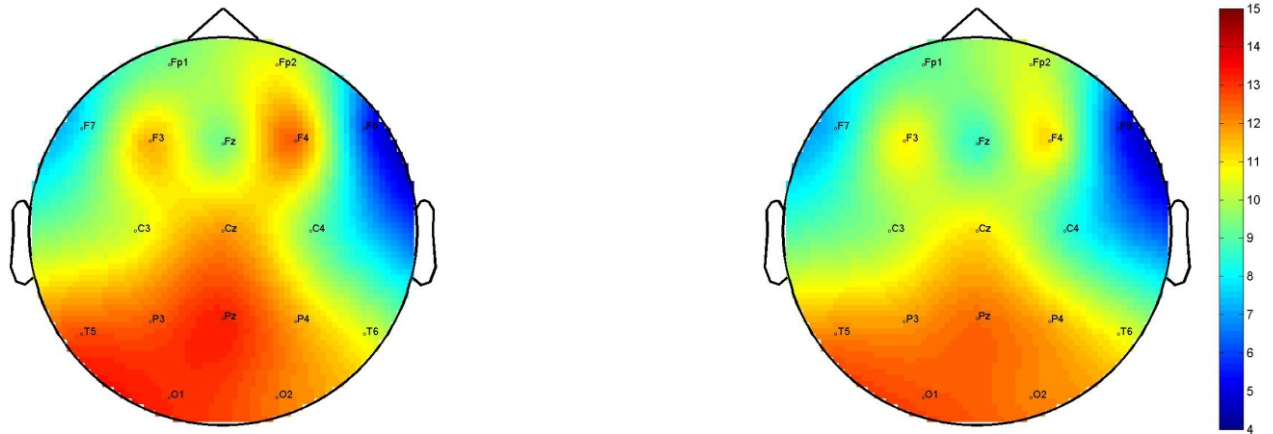

**C** Low performance group

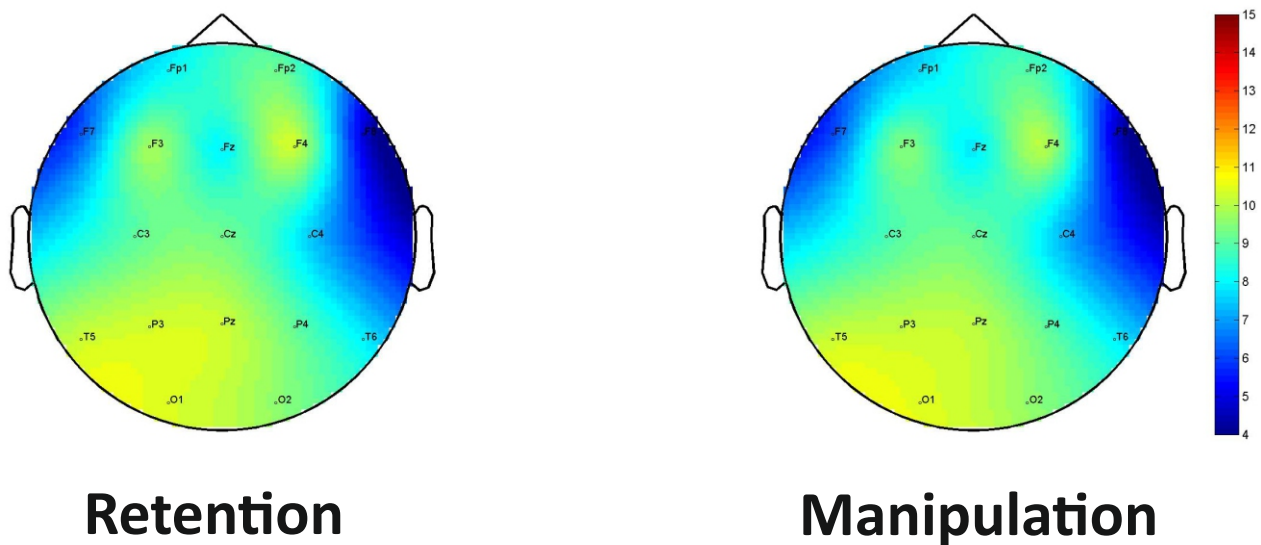

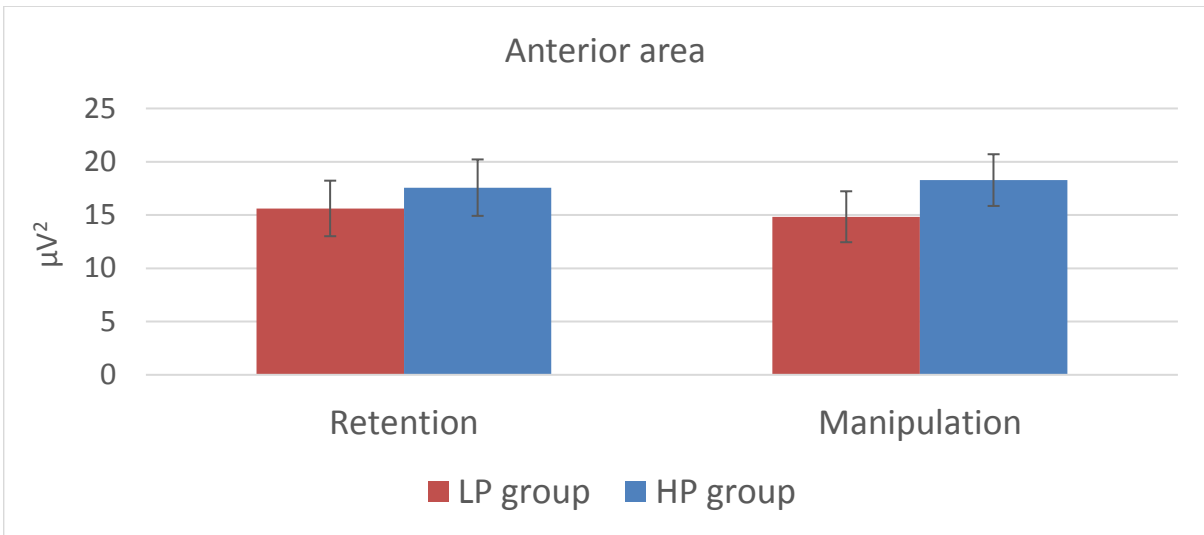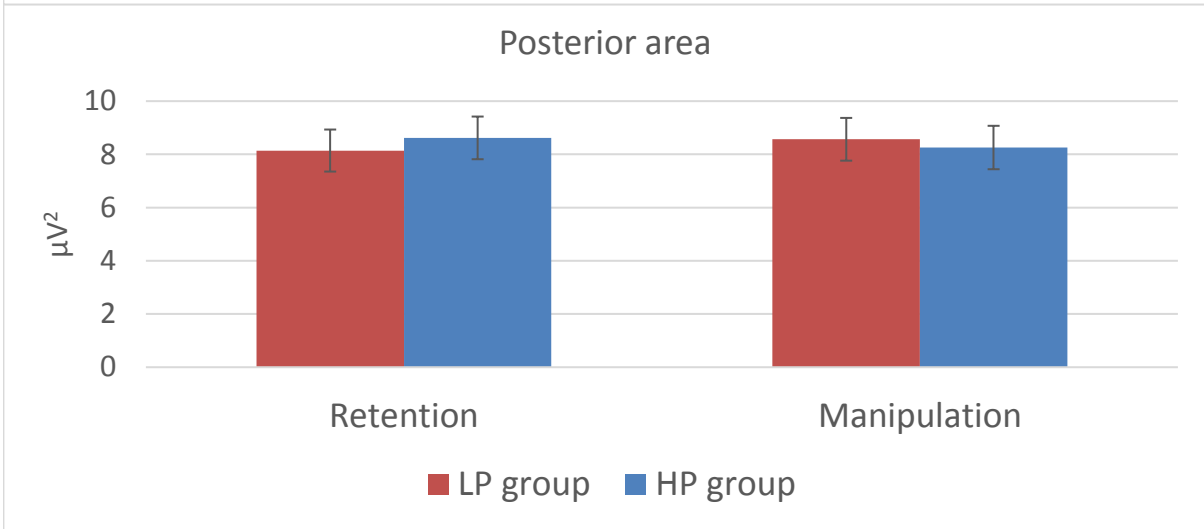

Source: http://biorxiv.org/content/10.1101/098301v1.full.pdf
